# Supplementary material
Source: Research Square preprint supplement (doi:10.21203/rs.3.rs-8892778/v1)
Supplement: Supplementary file 1 [file 286ecd7430b18709a9a3b01c.docx]

# **APPENDICES - QUANTITATIVE STUDY**

**Appendix 1. Quantitative Variable Definitions and Recoding Strategy**

This appendix documents how key quantitative variables were operationalized to support interpretability, subgroup comparisons, and alignment with campus health research standards.

**Table 1. Key Quantitative Variables and Definitions**

| Variable | Original Response Options | Recoded Variable | Definition |
| --- | --- | --- | --- |
| Physical activity | Very active; Somewhat active; Not very active; Not active at all | Low physical activity (binary) | 1 = Not very active / Not active at all |
| Stress level | Very low; Low; Moderate; High; Very high | High stress (binary) | 1 = High / Very high |
| Food satisfaction | Very satisfied; Satisfied; Neutral; Dissatisfied; Very dissatisfied | Food dissatisfaction (binary) | 1 = Dissatisfied / Very dissatisfied |
| Barriers to activity | Multi-response | Binary per option | 1 = Selected |
| Preferred activities | Multi-response | Binary per option | 1 = Selected |

**Rationale:**
Binary recoding is widely used in campus health needs assessments to enable clearer interpretation and policy-relevant subgroup analyses.

**Appendix 2. Quantitative Frequency Tables**

**Table 2a. Self-Rated Physical Activity Levels**

| Activity Level | n | % |
| --- | --- | --- |
| Very active | 35 | 18.6 |
| Somewhat active | 98 | 52.1 |
| Not very active | 49 | 26.1 |
| Not active at all | 6 | 3.2 |
| Low physical activity (binary) | **55** | **29.3** |

**Table 2b. Preferred Physical Activity Types Among Students (Multi-response, N = 188)**

| Physical Activity Type | n | % |
| --- | --- | --- |
| Walking clubs | 83 | 44.1 |
| Strength training / weightlifting | 78 | 41.5 |
| Group fitness classes (e.g., yoga, Zumba) | 76 | 40.4 |
| Team sports (e.g., football, basketball) | 71 | 37.8 |
| Pilates | 3 | 1.6 |
| Swimming | 2 | 1.1 |
| Cycling | 2 | 1.1 |
| Other activities | 3 | 1.6 |

Note. Percentages exceed 100% because respondents could select more than one option.

**Table 2c. Reported Barriers to Physical Activity Engagement (Multi-response, N = 188)**

| Barrier | n | % |
| --- | --- | --- |
| Lack of time | 91 | 48.4 |
| Low motivation | 54 | 28.7 |
| Lack of facilities | 22 | 11.7 |
| Do not know where to start | 15 | 8.0 |
| Facilities are too crowded | 3 | 1.6 |
| Lack of sports community | 2 | 1.1 |
| Nothing prevents me | 1 | 0.5 |

Note. Percentages exceed 100% because respondents could select more than one option.

**Table 2d. Self-Rated Stress Levels**

| Stress Level | n | % |
| --- | --- | --- |
| Very high | 27 | 14.4 |
| High | 53 | 28.2 |
| Moderate | 83 | 44.1 |
| Low | 23 | 12.2 |
| Very low | 2 | 1.1 |
| High stress (binary) | **80** | **42.6** |

**Table 2e. Satisfaction with Healthy Food Options**

| Satisfaction Level | n | % |
| --- | --- | --- |
| Very satisfied | 15 | 8.0 |
| Satisfied | 55 | 29.3 |
| Neutral | 68 | 36.2 |
| Dissatisfied | 35 | 18.6 |
| Very dissatisfied | 15 | 8.0 |
| Food dissatisfaction (binary) | **50** | **26.6** |

**Table 3. Mental Health and Wellness Service Interests - Interest in Wellness Services**

| Service | n | % |
| --- | --- | --- |
| Stress management workshops | 106 | 56.4 |
| Time management workshops | 77 | 41.0 |
| Mindfulness/meditation | 73 | 38.8 |
| Counselling services | 61 | 32.4 |
| Peer support groups | 38 | 20.2 |

**Table 4. Preferred Wellness Topics - Educational Topics of Interest**

| Topic | n | % |
| --- | --- | --- |
| Work/study-life balance | 109 | 58.0 |
| Healthy sleeping habits | 94 | 50.0 |
| Building healthy habits | 87 | 46.3 |
| Sleep hygiene | 68 | 36.2 |

**Table 5. Program Delivery Preferences - Preferred Timing**

| Timing | n | % |
| --- | --- | --- |
| After class/work | 56 | 29.8 |
| Evening (after 4 p.m.) | 49 | 26.1 |
| Lunch breaks | 29 | 15.4 |
| Weekends | 28 | 14.9 |
| Before class/work | 26 | 13.8 |

**Table 6. Preferred Format**

| Format | n | % |
| --- | --- | --- |
| In-person | 113 | 60.1 |
| Hybrid | 60 | 31.9 |
| Fully online | 15 | 8.0 |

**Table 7. Subgroup Comparison Results (Chi-Square Tests) - Associations Between Key Outcomes and Demographics**

| Outcome | Comparison | χ² | df | p-value | Interpretation |
| --- | --- | --- | --- | --- | --- |
| High stress | Gender | 0.74 | 1 | 0.39 | Not significant |
| Low physical activity | Gender | 2.15 | 1 | 0.14 | Not significant |
| Food dissatisfaction | Gender | 1.04 | 1 | 0.31 | Not significant |
| High stress | Campus | 3.67 | 1 | 0.056 | Borderline, not significant |
| Low physical activity | Campus | 1.57 | 1 | 0.21 | Not significant |
| Food dissatisfaction | Campus | 0.00 | 1 | 0.96 | Not significant |

**Appendix 3. Sociodemographic Characteristics of Survey Participants (N = 188)**

| Characteristic | Category | n | % |
| --- | --- | --- | --- |
| Student level | **Undergraduate** | 181 | 96.3 |
|  | **Postgraduate** | 7 | 3.7 |
| Gender | **Female** | 157 | 83.5 |
|  | **Male** | 28 | 14.9 |
|  | **Prefer not to say** | 3 | 1.6 |
| Campus | **Abu Dhabi** | 133 | 70.7 |
|  | **Al Ain** | 55 | 29.3 |

Note. Percentages may not sum to 100 due to rounding.

**Appendix 4. Quantitative Figures**

- Figure 1: Physical activity distribution
- Figure 2: Stress level distribution
- Figure 3: Food satisfaction distribution

(All figures generated using Microsoft excel; bar charts with percentages.)

**Figure 1: Physical activity distribution**

**Figure 2: Stress level distribution**

**Figure 3: Food satisfaction distribution**

**Appendix 5. ADU Health & Wellness Program Needs Assessment Survey**

Dear ADU Community,
The Health and Wellness Ambassador Committee is launching this survey to better understand your wellness needs. Your feedback will help us design programs and services that benefit you. This survey is anonymous and takes about 5–7 minutes to complete. Thank you for your time!

## **Section 1: General Information**

**1. Are you:**

☐ Student (Undergraduate)
☐ Student (Postgraduate)
☐ Faculty
☐ Staff (Administrative/Support)

**2. Gender:**

☐ Male
☐ Female
☐ Prefer not to say

**3. Which ADU campus are you based at?**

☐ Abu Dhabi
☐ Al Ain
☐ Dubai

## **Section 2: Physical Health**

**4. How would you rate your current level of physical activity?**

☐ Very active
☐ Somewhat active
☐ Not very active
☐ Not active at all

**5. What types of physical activities would you be interested in? (Check all that apply)**

☐ Walking clubs
☐ Group fitness classes (e.g., yoga, Zumba)
☐ Team sports (e.g., football, basketball)
☐ Strength training/weightlifting
☐ Other: ___________

**6. What prevents you from engaging in more physical activity?**

☐ Lack of time
☐ Lack of facilities
☐ Low motivation
☐ Don’t know where to start
☐ Other: ___________

## **Section 3: Mental Well-being**

**7. How would you rate your current stress levels?**

☐ Very high
☐ High
☐ Moderate
☐ Low
☐ Very low

**8. Which mental health and wellness services would you benefit from? (Check all that apply)**

☐ Stress management workshops
☐ Mindfulness/meditation sessions
☐ Counseling services
☐ Time management workshops
☐ Peer support groups
☐ Other: ___________’

## **Section 4: Nutrition & Lifestyle**

**9. How satisfied are you with the current healthy food options on campus?**

☐ Very satisfied
☐ Satisfied
☐ Neutral
☐ Dissatisfied
☐ Very dissatisfied

**10. What wellness topics would you like to learn more about? (Check all that apply)**

☐ Healthy eating habits
☐ Sleep hygiene
☐ Work/study-life balance
☐ Building healthy habits (exercise, nutrition, etc.)
☐ Other: ___________

## **Section 5: Program Preferences**

**11. What time of day would you most likely participate in wellness activities?**

☐ Before class/work
☐ During lunch breaks
☐ After class/work
☐ Evenings (after 6 PM)
☐ Weekends

**12. What format do you prefer for wellness programs?**

☐ In-person
☐ Online/virtual
☐ Hybrid (both in-person and online)

## **Section 6: Open Feedback**

**13. What wellness initiatives or programs would you like to see introduced at ADU?**

**14. Any additional suggestions or comments?**

**Appendix 5. Quantitative–Qualitative Integration Reference**

This appendix supports triangulation by linking quantitative indicators to qualitative themes (see Table 8).
