# Supplementary material
Source: Research Square preprint supplement (doi:10.21203/rs.3.rs-8892778/v1)
Supplement: Supplementary file 2 [file efc5e1ab1936f8a62298ff95.docx]

**APPENDICES – QUALITATIVE STUDY**

1. **Informed Consent Form – Focus Group Interview**

**Study Title:** Health & Wellness Needs Assessment
**Institution:** Abu Dhabi University

**Purpose of the Study**
You are invited to participate in a focus group discussion to share your views and experiences related to health and wellness. The information collected will help improve future wellness programs and services.

**Participation**
Your participation is voluntary. The focus group will last approximately 50–60 minutes. You may choose not to answer any question and may withdraw at any time without penalty.

**Confidentiality**
The discussion will be audio-recorded for research purposes. Your name will not be used in any reports, and all responses will be kept confidential. Data will be used only for research and reported in summary form.

**Risks and Benefits**
There are no anticipated risks beyond everyday conversation. While there may be no direct benefit to you, your input may help improve health and wellness initiatives.

**Consent**
By signing below, you confirm that:

- You are 18 years or older
- You understand the purpose of the study
- You voluntarily agree to participate

**Participant Name:** __________________________
**Signature:** ________________________________
**Date:** _xx Dec 2025___________________

**Researcher Contact:**
For questions about the study, please contact:
Dr. Maria Aamir – maria.aamir@adu.ac.ae

1. **Discussion Guide Overview**

Focus groups explored four main themes drawn from the survey:

**Theme 1: Mental Well-being**

- What are the main sources of stress for ADU students?
- How do students currently manage stress?
- What forms of mental health or wellness support would students find acceptable and useful?
- What prevents students from seeking help?

**Theme 2: Physical Activity and Motivation**

- Why do students find it difficult to engage in regular physical activity?
- What kind of activities do they prefer (gym, walking, sports, yoga, dance, etc.)?
- When and where should such activities take place to maximize participation?
- What would motivate them to sustain participation (incentives, social groups, competitions)?

**Theme 3: Nutrition and Lifestyle**

- How do students describe their eating habits at ADU?
- What challenges do they face in accessing healthy food?
- What changes would make healthy options more appealing (menu labeling, discounts, awareness)?
- What other lifestyle factors (sleep, hydration, screen time) affect their health?

**Theme 4: Future Program Design**

- What features would make ADU’s wellness program meaningful and sustainable?
- How can ADU promote these initiatives effectively?
- What short-term changes would they like to see immediately?

1. **Qualitative Analysis Table**

**8a. Theme 1: Chronic Academic and Performance-Related Stress**

**Theme definition:** Students experience stress as a persistent and systemic condition embedded within academic workload, assessment structures, performance expectations, time pressure, and future uncertainty. Stress is described as cumulative rather than episodic and is intensified by financial, familial, and institutional demands.

**FG1 – Theme 1 Analysis Table**

| Focus Group | Participant | Core Question | Verbatim Quote | Key Code | Sub-theme |
| --- | --- | --- | --- | --- | --- |
| FG1 | P1 | Sources of stress | “The main stress is exams and deadlines… group work stresses me more when others don’t put in effort.” | Academic workload | Assessment pressure |
| FG1 | P2 | Sources of stress | “There’s pressure to maintain GPA, especially with scholarships and family expectations.” | Performance pressure | GPA & financial stakes |
| FG1 | P3 | Sources of stress | “Worrying about the future and choosing the right major adds stress.” | Future uncertainty | Career anxiety |
| FG1 | P4 | Sources of stress | “Exams are the worst nightmare… even before doing them.” | Exam anxiety | Anticipatory stress |
| FG1 | P5 | Sources of stress | “Assignments pile up near finals… especially stressful with scholarships.” | Time pressure | Cumulative workload |

**FG2 – Theme 1 Analysis Table**

| Focus Group | Participant | Core Question | Verbatim Quote | Key Code | Sub-theme |
| --- | --- | --- | --- | --- | --- |
| FG2 | P1 | Sources of stress | “Deadlines and exams cause burnout, especially with many courses.” | Academic workload | Burnout from workload |
| FG2 | P2 | Sources of stress | “Group projects are stressful when others don’t contribute.” | Group work stress | Assessment inequity |
| FG2 | P3 | Sources of stress | “University bureaucracy adds unnecessary stress.” | Institutional stress | Administrative burden |
| FG2 | P4 | Sources of stress | “Final exams come with very short preparation time.” | Time compression | Structural pressure |
| FG2 | P5 | Sources of stress | “Scholarship requirements make everything more stressful.” | Financial pressure | Performance-linked stress |

**FG3 – Theme 1 Analysis Table**

| Focus Group | Participant | Core Question | Verbatim Quote | Key Code | Sub-theme |
| --- | --- | --- | --- | --- | --- |
| FG3 | P1 | Sources of stress | “Balancing classes and personal life is very stressful.” | Role conflict | Academic–life imbalance |
| FG3 | P2 | Sources of stress | “Not knowing expectations clearly adds stress.” | Academic uncertainty | Communication gaps |
| FG3 | P3 | Sources of stress | “Group roles are unclear and stressful.” | Group work stress | Assessment structure |
| FG3 | P4 | Sources of stress | “Stress increases during midterms and finals.” | Peak stress | Exam cycles |
| FG3 | P5 | Sources of stress | “Fear of failing affects mental health.” | Performance anxiety | Psychological impact |

**FG4 – Theme 1 Analysis Table**

| Focus Group | Participant | Core Question | Verbatim Quote | Key Code | Sub-theme |
| --- | --- | --- | --- | --- | --- |
| FG4 | P1 | Sources of stress | “Stress is constant, not only during exams.” | Chronic stress | Persistent pressure |
| FG4 | P2 | Sources of stress | “Family expectations add pressure.” | Familial pressure | External expectations |
| FG4 | P3 | Sources of stress | “Career uncertainty causes anxiety.” | Future uncertainty | Post-graduation fear |
| FG4 | P4 | Sources of stress | “Internships and studies together are overwhelming.” | Role overload | Competing demands |
| FG4 | P5 | Sources of stress | “I’m afraid of disappointing people.” | Emotional burden | Self-worth stress |

**FG5 – Theme 1 Analysis Table**

| Focus Group | Participant | Core Question | Verbatim Quote | Key Code | Sub-theme |
| --- | --- | --- | --- | --- | --- |
| FG5 | P1 | Sources of stress | “Stress builds over the semester.” | Cumulative stress | Progressive overload |
| FG5 | P2 | Sources of stress | “Deadlines close together increase anxiety.” | Time compression | Scheduling pressure |
| FG5 | P3 | Sources of stress | “Fear of low GPA is constant.” | Performance pressure | Academic self-evaluation |
| FG5 | P4 | Sources of stress | “Competition among students adds stress.” | Competition | Social comparison |
| FG5 | P5 | Sources of stress | “Financial responsibilities add pressure.” | Financial stress | Economic strain |

**FG6 – Theme 1 Analysis Table**

| Focus Group | Participant | Core Question | Verbatim Quote | Key Code | Sub-theme |
| --- | --- | --- | --- | --- | --- |
| FG6 | P1 | Sources of stress | “Balancing study, work, and family causes stress.” | Role overload | Multiple responsibilities |
| FG6 | P2 | Sources of stress | “Deadlines conflict with work schedules.” | Time conflict | Structural inflexibility |
| FG6 | P3 | Sources of stress | “Career uncertainty adds anxiety.” | Future uncertainty | Long-term stress |
| FG6 | P4 | Sources of stress | “Time pressure affects mental health.” | Time pressure | Mental health impact |
| FG6 | P5 | Sources of stress | “Burnout builds gradually.” | Burnout | Chronic exhaustion |

**Frequency Summary for Theme 1 Across Focus Groups**

| Code Category | FG1 | FG2 | FG3 | FG4 | FG5 | FG6 | Total |
| --- | --- | --- | --- | --- | --- | --- | --- |
| Academic workload / deadlines | 3 | 2 | 1 | 1 | 2 | 2 | 11 |
| Time pressure / compression | 1 | 1 | 0 | 0 | 1 | 2 | 5 |
| Performance & GPA pressure | 1 | 1 | 1 | 0 | 1 | 0 | 4 |
| Financial pressure | 2 | 1 | 0 | 0 | 1 | 0 | 4 |
| Group work stress | 1 | 1 | 1 | 0 | 0 | 0 | 3 |
| Future uncertainty | 1 | 0 | 0 | 1 | 0 | 1 | 3 |
| Role overload / work–life conflict | 0 | 0 | 1 | 1 | 0 | 1 | 3 |
| Institutional / administrative stress | 0 | 1 | 0 | 0 | 0 | 0 | 1 |
| Competition | 0 | 0 | 0 | 0 | 1 | 0 | 1 |
| Burnout / chronic stress | 0 | 1 | 0 | 1 | 0 | 1 | 3 |

**8b. Theme 2: Predominant Reliance on Informal and Self-Directed Coping Strategies**

**Theme definition**Students primarily cope with academic stress through informal, self-initiated strategies such as peer and family support, time management, lifestyle behaviours, and cognitive reframing rather than through formal institutional mental health services. Coping is often proactive but individualized, short-term, and reactive to workload demands.

**FG1 – Theme 2 Analysis Table**

| Focus Group | Participant | Core Question | Verbatim Quote | Key Code | Sub-theme |
| --- | --- | --- | --- | --- | --- |
| FG1 | P1 | Coping strategies | “Planning with Google Calendar and checking the syllabus early really helps reduce stress.” | Time management | Proactive planning |
| FG1 | P2 | Coping strategies | “Talking to friends and family helps a lot… and exercising and sleeping properly.” | Social support | Social & lifestyle coping |
| FG1 | P3 | Coping strategies | “Having a support system is essential… mental health comes first.” | Social support | Emotional reliance |
| FG1 | P4 | Coping strategies | “Not isolating yourself helps… even small hobbies for 10 minutes make a difference.” | Self-care | Micro self-care |
| FG1 | P5 | Coping strategies | “I try to pre-study chapters before lectures so I don’t feel stressed later.” | Academic preparation | Preventive coping |

**FG2 – Theme 2 Analysis Table**

| Focus Group | Participant | Core Question | Verbatim Quote | Key Code | Sub-theme |
| --- | --- | --- | --- | --- | --- |
| FG2 | P1 | Coping strategies | “I manage stress by staying active and motivated.” | Physical activity | Exercise-based coping |
| FG2 | P2 | Coping strategies | “To-do lists and talking with family help.” | Time management | Planning & family support |
| FG2 | P3 | Coping strategies | “Going to the gym and socializing helps me avoid overthinking.” | Physical activity | Social-lifestyle coping |
| FG2 | P4 | Coping strategies | “Planning weeks ahead helps reduce exam anxiety.” | Anticipatory planning | Exam preparation |
| FG2 | P5 | Coping strategies | “Positive thinking and gratitude help.” | Cognitive coping | Positive reframing |

**FG3 – Theme 2 Analysis Table**

| Focus Group | Participant | Core Question | Verbatim Quote | Key Code | Sub-theme |
| --- | --- | --- | --- | --- | --- |
| FG3 | P1 | Coping strategies | “Walking around campus helps clear my mind.” | Physical activity | Low-barrier activity |
| FG3 | P2 | Coping strategies | “Time-management apps really help.” | Time management | Digital planning |
| FG3 | P3 | Coping strategies | “Talking to classmates helps normalize stress.” | Peer support | Shared experience |
| FG3 | P4 | Coping strategies | “Short breaks during study improve focus.” | Self-care | Micro-breaks |
| FG3 | P5 | Coping strategies | “Listening to music helps reduce anxiety.” | Emotional regulation | Mood regulation |

**FG4 – Theme 2 Analysis Table**

| Focus Group | Participant | Core Question | Verbatim Quote | Key Code | Sub-theme |
| --- | --- | --- | --- | --- | --- |
| FG4 | P1 | Coping strategies | “Exercise helps but time is limited.” | Physical activity | Time-constrained coping |
| FG4 | P2 | Coping strategies | “Prayer and spirituality help calm stress.” | Spiritual coping | Cultural coping |
| FG4 | P3 | Coping strategies | “Spending time with friends helps.” | Social support | Interpersonal coping |
| FG4 | P4 | Coping strategies | “Breaks are important but difficult to take.” | Self-care | Competing demands |
| FG4 | P5 | Coping strategies | “Sleep is sacrificed first.” | Lifestyle trade-off | Maladaptive coping |

**FG5 – Theme 2 Analysis Table**

| Focus Group | Participant | Core Question | Verbatim Quote | Key Code | Sub-theme |
| --- | --- | --- | --- | --- | --- |
| FG5 | P1 | Coping strategies | “Exercise helps but motivation is low.” | Physical activity | Motivation barrier |
| FG5 | P2 | Coping strategies | “Talking to friends helps most.” | Peer support | Primary coping |
| FG5 | P3 | Coping strategies | “I feel guilty taking breaks.” | Emotional response | Guilt-based coping |
| FG5 | P4 | Coping strategies | “Watching shows helps temporarily.” | Avoidance | Short-term relief |
| FG5 | P5 | Coping strategies | “Sleep improves mood but is inconsistent.” | Lifestyle coping | Irregular regulation |

**FG6 – Theme 2 Analysis Table**

| Focus Group | Participant | Core Question | Verbatim Quote | Key Code | Sub-theme |
| --- | --- | --- | --- | --- | --- |
| FG6 | P1 | Coping strategies | “Exercise helps but is hard to schedule.” | Physical activity | Time-barrier coping |
| FG6 | P2 | Coping strategies | “Sleep suffers due to responsibilities.” | Lifestyle trade-off | Role strain |
| FG6 | P3 | Coping strategies | “Support from family helps.” | Family support | Familial coping |
| FG6 | P4 | Coping strategies | “Short walks help manage stress.” | Physical activity | Low-intensity coping |
| FG6 | P5 | Coping strategies | “Routine helps maintain balance.” | Structure | Stability-seeking |

**Frequency Summary for Theme 2 Across Focus Groups**

| Code Category | FG1 | FG2 | FG3 | FG4 | FG5 | FG6 | Total |
| --- | --- | --- | --- | --- | --- | --- | --- |
| Social / peer support | 2 | 1 | 1 | 1 | 1 | 1 | 7 |
| Family support | 1 | 1 | 0 | 0 | 0 | 1 | 3 |
| Time management / planning | 2 | 2 | 1 | 0 | 0 | 0 | 5 |
| Academic preparation | 1 | 1 | 0 | 0 | 0 | 0 | 2 |
| Physical activity | 1 | 2 | 1 | 1 | 1 | 2 | 8 |
| Self-care / micro-breaks | 1 | 0 | 2 | 1 | 0 | 0 | 4 |
| Cognitive / emotional regulation | 0 | 1 | 1 | 0 | 1 | 0 | 3 |
| Spiritual coping | 0 | 0 | 0 | 1 | 0 | 0 | 1 |
| Avoidance / maladaptive coping | 0 | 0 | 0 | 1 | 1 | 1 | 3 |

**Total coded references (Theme 2): 36**

**8c. Theme 3: Barriers to Formal Mental Health Support and Help-Seeking**

**FG1 – Theme 3 Analysis Table**

| Focus Group | Participant | Core Question | Verbatim Quote | Key Code | Sub-theme |
| --- | --- | --- | --- | --- | --- |
| FG1 | P1 | Barriers to seeking help | “Fear of being judged stops people from asking for help.” | Stigma | Fear of judgment |
| FG1 | P2 | Barriers to seeking help | “People worry they won’t be understood.” | Stigma | Fear of misunderstanding |
| FG1 | P3 | Accessibility | “Services are not easy to access when you really need them.” | Accessibility | Structural barriers |
| FG1 | P4 | Barriers to seeking help | “Judgment again… that’s the main thing.” | Stigma | Social judgment |
| FG1 | P5 | Barriers to seeking help | “Heavy schedules make it hard to seek help.” | Accessibility | Time constraints |

**FG2 – Theme 3 Analysis Table**

| Focus Group | Participant | Core Question | Verbatim Quote | Key Code | Sub-theme |
| --- | --- | --- | --- | --- | --- |
| FG2 | P1 | Help-seeking behaviour | “Students rely more on friends than professionals.” | Informal preference | Peer-first support |
| FG2 | P2 | Barriers to seeking help | “Mental health is still stigmatized in society.” | Cultural stigma | Societal norms |
| FG2 | P3 | Confidentiality | “People worry about who will know.” | Confidentiality | Privacy concerns |
| FG2 | P4 | Alternatives to counselling | “Places like the gym already help mentally.” | Informal coping | Non-clinical spaces |
| FG2 | P5 | Preferred format | “Anonymous support would make it easier.” | Anonymity | Anonymous access |

**FG3 – Theme 3 Analysis Table**

| Focus Group | Participant | Core Question | Verbatim Quote | Key Code | Sub-theme |
| --- | --- | --- | --- | --- | --- |
| FG3 | P1 | Barriers to seeking help | “People are afraid of how they will be seen.” | Stigma | Social perception |
| FG3 | P2 | Awareness of services | “Services are not advertised clearly.” | Low awareness | Poor visibility |
| FG3 | P3 | Help-seeking behaviour | “Students go to friends first.” | Informal preference | Peer reliance |
| FG3 | P4 | Confidentiality | “Privacy is very important.” | Confidentiality | Privacy concerns |
| FG3 | P5 | Preferred format | “Anonymous options would increase usage.” | Anonymity | Anonymous access |

**FG4 – Theme 3 Analysis Table**

| Focus Group | Participant | Core Question | Verbatim Quote | Key Code | Sub-theme |
| --- | --- | --- | --- | --- | --- |
| FG4 | P1 | Barriers to seeking help | “Counselling is seen as weakness.” | Stigma | Perceived weakness |
| FG4 | P2 | Confidentiality | “People worry about confidentiality.” | Confidentiality | Privacy concerns |
| FG4 | P3 | Trust in services | “Students need reassurance services are safe.” | Trust | Trust in providers |
| FG4 | P4 | Preferred format | “Workshops feel safer than one-to-one counselling.” | Format preference | Low-threshold entry |
| FG4 | P5 | Comfort level | “Peer support feels more comfortable.” | Informal preference | Peer-led support |

**FG5 – Theme 3 Analysis Table**

| Focus Group | Participant | Core Question | Verbatim Quote | Key Code | Sub-theme |
| --- | --- | --- | --- | --- | --- |
| FG5 | P1 | Barriers to seeking help | “People don’t want to be labelled.” | Stigma | Label avoidance |
| FG5 | P2 | Confidentiality | “Confidentiality concerns stop people.” | Confidentiality | Privacy concerns |
| FG5 | P3 | Awareness of services | “Many students don’t know services exist.” | Low awareness | Service invisibility |
| FG5 | P4 | Preferred format | “Online support feels safer.” | Online preference | Digital anonymity |
| FG5 | P5 | Preferred model | “Peer-led support would help.” | Informal preference | Peer-led models |

**FG6 – Theme 3 Analysis Table**

| Focus Group | Participant | Core Question | Verbatim Quote | Key Code | Sub-theme |
| --- | --- | --- | --- | --- | --- |
| FG6 | P1 | Barriers to seeking help | “Stigma still exists, even for older students.” | Stigma | Persistent stigma |
| FG6 | P2 | Confidentiality | “Privacy is essential.” | Confidentiality | Privacy concerns |
| FG6 | P3 | Accessibility | “Flexible access matters.” | Accessibility | Scheduling flexibility |
| FG6 | P4 | Preferred format | “Online support fits better.” | Online preference | Flexible delivery |
| FG6 | P5 | Preferred format | “Workshops are less intimidating.” | Format preference | Low-intensity support |

**Frequency Summary for Theme 3 Across Focus Groups (FG1–FG6)**

| Barrier Category | FG1 | FG2 | FG3 | FG4 | FG5 | FG6 | Total |
| --- | --- | --- | --- | --- | --- | --- | --- |
| Stigma / fear of judgment | **3** | **2** | **2** | **3** | **2** | **2** | **14** |
| Confidentiality / privacy concerns | **1** | **1** | **1** | **1** | **1** | **1** | **6** |
| Preference for informal support (friends/peers) | **0** | **2** | **1** | **1** | **1** | **0** | **5** |
| Low awareness of services | **0** | **0** | **1** | **0** | **1** | **0** | **2** |
| Cultural norms around mental health | **0** | **1** | **0** | **1** | **0** | **0** | **2** |
| Accessibility / time constraints | **2** | **0** | **0** | **0** | **0** | **1** | **3** |
| Preference for anonymous or online formats | **0** | **1** | **1** | **1** | **1** | **1** | **5** |
| Trust in services | **0** | **0** | **0** | **1** | **0** | **0** | **1** |

**Total coded references (Theme 3): 38**

**8d. Theme 4: Physical Activity, Nutrition, Lifestyle Constraints, and Program Design Preferences**

**Theme definition**Students express strong interest in physical activity and healthy lifestyle behaviours but encounter structural, motivational, and environmental barriers. Preferences emphasize flexibility, accessibility, social engagement, and integration of wellness activities into academic life.

**FG1 – Theme 4 Analysis Table**

| Focus Group | Participant | Core Question | Verbatim Quote | Key Code | Sub-theme |
| --- | --- | --- | --- | --- | --- |
| FG1 | P1 | Physical activity barriers | “Time is the biggest problem, especially with exams.” | Time constraint | Academic workload |
| FG1 | P2 | Physical activity preferences | “Walking clubs or simple activities would be nice.” | Activity preference | Low-intensity exercise |
| FG1 | P3 | Nutrition | “Healthy food is expensive on campus.” | Food affordability | Cost barrier |
| FG1 | P4 | Lifestyle | “Sleep is affected during busy weeks.” | Sleep disruption | Academic pressure |
| FG1 | P5 | Program design | “Programs should be after class.” | Timing preference | Evening sessions |

**FG2 – Theme 4 Analysis Table**

| Focus Group | Participant | Core Question | Verbatim Quote | Key Code | Sub-theme |
| --- | --- | --- | --- | --- | --- |
| FG2 | P1 | Physical activity barriers | “Motivation drops when workload increases.” | Motivation barrier | Academic stress |
| FG2 | P2 | Activity preferences | “Group fitness is more motivating.” | Social activity | Group-based exercise |
| FG2 | P3 | Nutrition | “Healthy options are limited.” | Food availability | Environmental barrier |
| FG2 | P4 | Lifestyle | “Long study hours affect sleep.” | Sleep disruption | Study demands |
| FG2 | P5 | Program design | “Hybrid programs would help.” | Format preference | Hybrid delivery |

**FG3 – Theme 4 Analysis Table**

| Focus Group | Participant | Core Question | Verbatim Quote | Key Code | Sub-theme |
| --- | --- | --- | --- | --- | --- |
| FG3 | P1 | Physical activity barriers | “Facilities are not always convenient.” | Facility access | Location barrier |
| FG3 | P2 | Activity preferences | “Short workouts fit better.” | Micro-exercise | Time efficiency |
| FG3 | P3 | Nutrition | “Food choices affect energy.” | Diet-energy link | Academic performance |
| FG3 | P4 | Lifestyle | “Screen time affects sleep.” | Screen use | Lifestyle imbalance |
| FG3 | P5 | Program design | “In-person sessions feel more engaging.” | Delivery preference | Face-to-face engagement |

**FG4 – Theme 4 Analysis Table**

| Focus Group | Participant | Core Question | Verbatim Quote | Key Code | Sub-theme |
| --- | --- | --- | --- | --- | --- |
| FG4 | P1 | Physical activity barriers | “Gym timing doesn’t match my schedule.” | Scheduling barrier | Accessibility |
| FG4 | P2 | Activity preferences | “Gender-specific sessions would help.” | Cultural preference | Comfort & inclusion |
| FG4 | P3 | Nutrition | “Unhealthy food is more convenient.” | Convenience bias | Food environment |
| FG4 | P4 | Lifestyle | “Stress affects eating habits.” | Stress-eating link | Emotional eating |
| FG4 | P5 | Program design | “Wellness should be integrated into classes.” | Integration | Curriculum-linked wellness |

**FG5 – Theme 4 Analysis Table**

| Focus Group | Participant | Core Question | Verbatim Quote | Key Code | Sub-theme |
| --- | --- | --- | --- | --- | --- |
| FG5 | P1 | Physical activity barriers | “I want to exercise but feel tired.” | Fatigue | Burnout |
| FG5 | P2 | Activity preferences | “Team sports are more fun.” | Team activities | Social motivation |
| FG5 | P3 | Nutrition | “Healthy food costs more.” | Food affordability | Financial barrier |
| FG5 | P4 | Lifestyle | “Sleep schedule is irregular.” | Sleep irregularity | Academic lifestyle |
| FG5 | P5 | Program design | “Incentives would motivate participation.” | Incentives | Engagement strategy |

**FG6 – Theme 4 Analysis Table**

| Focus Group | Participant | Core Question | Verbatim Quote | Key Code | Sub-theme |
| --- | --- | --- | --- | --- | --- |
| FG6 | P1 | Physical activity barriers | “Work and study leave no time.” | Time conflict | Multiple roles |
| FG6 | P2 | Activity preferences | “Flexible options are important.” | Flexibility | Accessibility |
| FG6 | P3 | Nutrition | “Meal planning is difficult.” | Planning barrier | Lifestyle constraint |
| FG6 | P4 | Lifestyle | “Sleep quality is poor.” | Sleep quality | Well-being impact |
| FG6 | P5 | Program design | “Programs should be practical.” | Practicality | Real-world relevance |

**Frequency Summary for Theme 4 Across FG1–FG6**

| Category | FG1 | FG2 | FG3 | FG4 | FG5 | FG6 | Total |
| --- | --- | --- | --- | --- | --- | --- | --- |
| Time constraints (PA & lifestyle) | 1 | 1 | 0 | 1 | 1 | 1 | 5 |
| Motivation / fatigue | 0 | 1 | 0 | 0 | 1 | 0 | 2 |
| Preference for group/social activity | 1 | 1 | 0 | 0 | 1 | 0 | 3 |
| Food affordability | 1 | 0 | 0 | 0 | 1 | 0 | 2 |
| Food availability / convenience | 0 | 1 | 0 | 1 | 0 | 0 | 2 |
| Sleep disruption / irregularity | 1 | 1 | 1 | 0 | 1 | 1 | 5 |
| In-person / hybrid preference | 1 | 1 | 1 | 0 | 0 | 0 | 3 |
| Flexibility & integration | 0 | 0 | 0 | 1 | 1 | 1 | 3 |

**Total coded references (Theme 4): 25**

**8e. Theme 5: Expectations for an Integrated, Flexible, and Student-centred Health & Wellness Program**

**Theme definition**Students articulated clear expectations for a Health & Wellness Program that is practical, flexible, inclusive, culturally sensitive, and embedded within university life. Sustainability, accessibility, and relevance to real student needs were emphasized over one-time or generic initiatives.

**FG1 – Theme 5 Analysis Table**

| Focus Group | Participant | Core Question | Verbatim Quote | Key Code | Sub-theme |
| --- | --- | --- | --- | --- | --- |
| FG1 | P1 | Program expectations | “Programs should be practical, not just talks.” | Practicality | Action-oriented design |
| FG1 | P2 | Program expectations | “Wellness should be part of campus life, not separate.” | Integration | Embedded wellness |
| FG1 | P3 | Program promotion | “Students need reminders and visibility.” | Promotion | Awareness & outreach |
| FG1 | P4 | Program sustainability | “It shouldn’t be a one-time event.” | Sustainability | Ongoing programming |
| FG1 | P5 | Engagement | “Incentives would encourage participation.” | Incentives | Motivation strategies |

**FG2 – Theme 5 Analysis Table**

| Focus Group | Participant | Core Question | Verbatim Quote | Key Code | Sub-theme |
| --- | --- | --- | --- | --- | --- |
| FG2 | P1 | Program design | “Short workshops work better.” | Time efficiency | Micro-sessions |
| FG2 | P2 | Delivery format | “Hybrid options would help busy students.” | Flexibility | Hybrid delivery |
| FG2 | P3 | Program relevance | “Programs should address real student stress.” | Relevance | Needs-based content |
| FG2 | P4 | Peer involvement | “Peer-led programs feel more relatable.” | Peer leadership | Peer engagement |
| FG2 | P5 | Accessibility | “Easy sign-up matters.” | Accessibility | Low administrative burden |

**FG3 – Theme 5 Analysis Table**

| Focus Group | Participant | Core Question | Verbatim Quote | Key Code | Sub-theme |
| --- | --- | --- | --- | --- | --- |
| FG3 | P1 | Program design | “Wellness should fit student schedules.” | Scheduling | Student-centered timing |
| FG3 | P2 | Delivery format | “In-person sessions are more motivating.” | In-person preference | Engagement |
| FG3 | P3 | Promotion | “Use social media to promote programs.” | Digital outreach | Communication channels |
| FG3 | P4 | Sustainability | “Programs need continuity.” | Sustainability | Long-term planning |
| FG3 | P5 | Evaluation | “Feedback should be collected.” | Evaluation | Continuous improvement |

**FG4 – Theme 5 Analysis Table**

| Focus Group | Participant | Core Question | Verbatim Quote | Key Code | Sub-theme |
| --- | --- | --- | --- | --- | --- |
| FG4 | P1 | Cultural relevance | “Programs must respect cultural norms.” | Cultural sensitivity | Inclusion |
| FG4 | P2 | Program structure | “Separate sessions may help comfort.” | Gender consideration | Safe spaces |
| FG4 | P3 | Leadership role | “University leadership support matters.” | Institutional support | Governance |
| FG4 | P4 | Integration | “Wellness should link with academics.” | Academic integration | Curriculum alignment |
| FG4 | P5 | Trust | “Students need to trust the program.” | Trust-building | Credibility |

**FG5 – Theme 5 Analysis Table**

| Focus Group | Participant | Core Question | Verbatim Quote | Key Code | Sub-theme |
| --- | --- | --- | --- | --- | --- |
| FG5 | P1 | Engagement | “Rewards would increase participation.” | Incentives | Motivation |
| FG5 | P2 | Delivery format | “Hybrid is the best option.” | Flexibility | Mixed delivery |
| FG5 | P3 | Content focus | “Stress and sleep should be priorities.” | Content priority | Mental health focus |
| FG5 | P4 | Promotion | “Ambassadors can help.” | Peer promotion | Student leadership |
| FG5 | P5 | Sustainability | “Programs should run all semester.” | Sustainability | Program continuity |

**FG6 – Theme 5 Analysis Table**

| Focus Group | Participant | Core Question | Verbatim Quote | Key Code | Sub-theme |
| --- | --- | --- | --- | --- | --- |
| FG6 | P1 | Accessibility | “Programs must fit working students.” | Flexibility | Inclusivity |
| FG6 | P2 | Delivery format | “Online options help.” | Online preference | Accessibility |
| FG6 | P3 | Content relevance | “Practical skills are needed.” | Practical relevance | Skills-based |
| FG6 | P4 | Sustainability | “Wellness should be long-term.” | Sustainability | Institutionalization |
| FG6 | P5 | Integration | “Wellness should be part of orientation.” | Early integration | Preventive approach |

**Frequency Summary for Theme 5 Across FG1–FG6**

| Category | FG1 | FG2 | FG3 | FG4 | FG5 | FG6 | Total |
| --- | --- | --- | --- | --- | --- | --- | --- |
| Practical / skills-based programs | 1 | 1 | 0 | 0 | 1 | 1 | 4 |
| Flexibility (timing, format) | 0 | 1 | 1 | 0 | 1 | 1 | 4 |
| In-person / hybrid preference | 0 | 1 | 1 | 0 | 1 | 0 | 3 |
| Sustainability / continuity | 1 | 0 | 1 | 0 | 1 | 1 | 4 |
| Peer involvement / ambassadors | 0 | 1 | 1 | 0 | 1 | 0 | 3 |
| Cultural sensitivity | 0 | 0 | 0 | 1 | 0 | 0 | 1 |
| Institutional integration | 1 | 0 | 1 | 1 | 0 | 1 | 4 |
| Incentives / rewards | 1 | 0 | 0 | 0 | 1 | 0 | 2 |

**Total coded references (Theme 5): 25**

**Appendix 9. Qualitative–Quantitative Integrated findings**

| Wellness Domain | Quantitative Findings | Qualitative Themes | Integrated Interpretation | Program Implications |
| --- | --- | --- | --- | --- |
| Mental well-being & stress | 42.6% reported high or very high stress | **Theme 1:** Chronic academic and performance-related stress | Stress is persistent, cumulative, and structurally embedded in academic life rather than episodic | Address academic stress through multi-level interventions, including stress-management skills, curriculum pacing, assessment scheduling, and academic-life balance initiatives |
| Coping behaviours | High interest in stress and time-management programs; comparatively lower interest in counselling | **Theme 2:** Informal, self-directed coping strategies | Students rely on peer support, planning, physical activity, and short-term self-care rather than formal services | Design skills-based workshops (e.g., time management, mindfulness, resilience) that align with students’ existing coping practices |
| Help-seeking | 32.4% expressed interest in counselling services | **Theme 3:** Barriers to formal mental health support | Stigma, confidentiality concerns, cultural norms, and access barriers limit engagement with counselling | Implement low-stigma entry points (workshops, peer-led programs, anonymous/online options) and strengthen communication around confidentiality and service pathways |
| Physical activity | 29.3% reported low physical activity; key barriers were time (48.4%) and motivation (28.7%) | **Theme 4:** Structural and motivational constraints | Academic workload, fatigue, and scheduling conflicts restrict participation in physical activity | Offer flexible, low-time-burden physical activity options (e.g., walking clubs, short group sessions) integrated into campus schedules |
| Nutrition & lifestyle | 26.6% dissatisfied with healthy food options; widespread sleep concerns | **Theme 4:** Food affordability and sleep disruption | Lifestyle behaviours are interconnected and strongly influenced by campus food environments and academic stress | Improve access to affordable healthy food options and integrate sleep education into wellness programming |
| Program preferences | Preference for in-person (60.1%) or hybrid (31.9%) programs; evenings preferred | **Theme 5:** Flexible, integrated, student-centred programs | Students value accessible, engaging programs that fit academic schedules and cultural context | Schedule programs after classes or in the evening and prioritize in-person or hybrid delivery formats |
| Engagement & sustainability | High interest in workshops and lifestyle-related topics | **Theme 5:** Sustainability and peer involvement | Long-term engagement requires trust, continuity, and institutional commitment | Embed wellness initiatives into university structures, involve student ambassadors, and ensure programs are ongoing rather than one-time events |
